# Supplementary material
Source: PubMed Central journal article supplement (PMC9052739)
Supplement: mmc1.pdf [file mmc1.pdf]

Supplementary Information

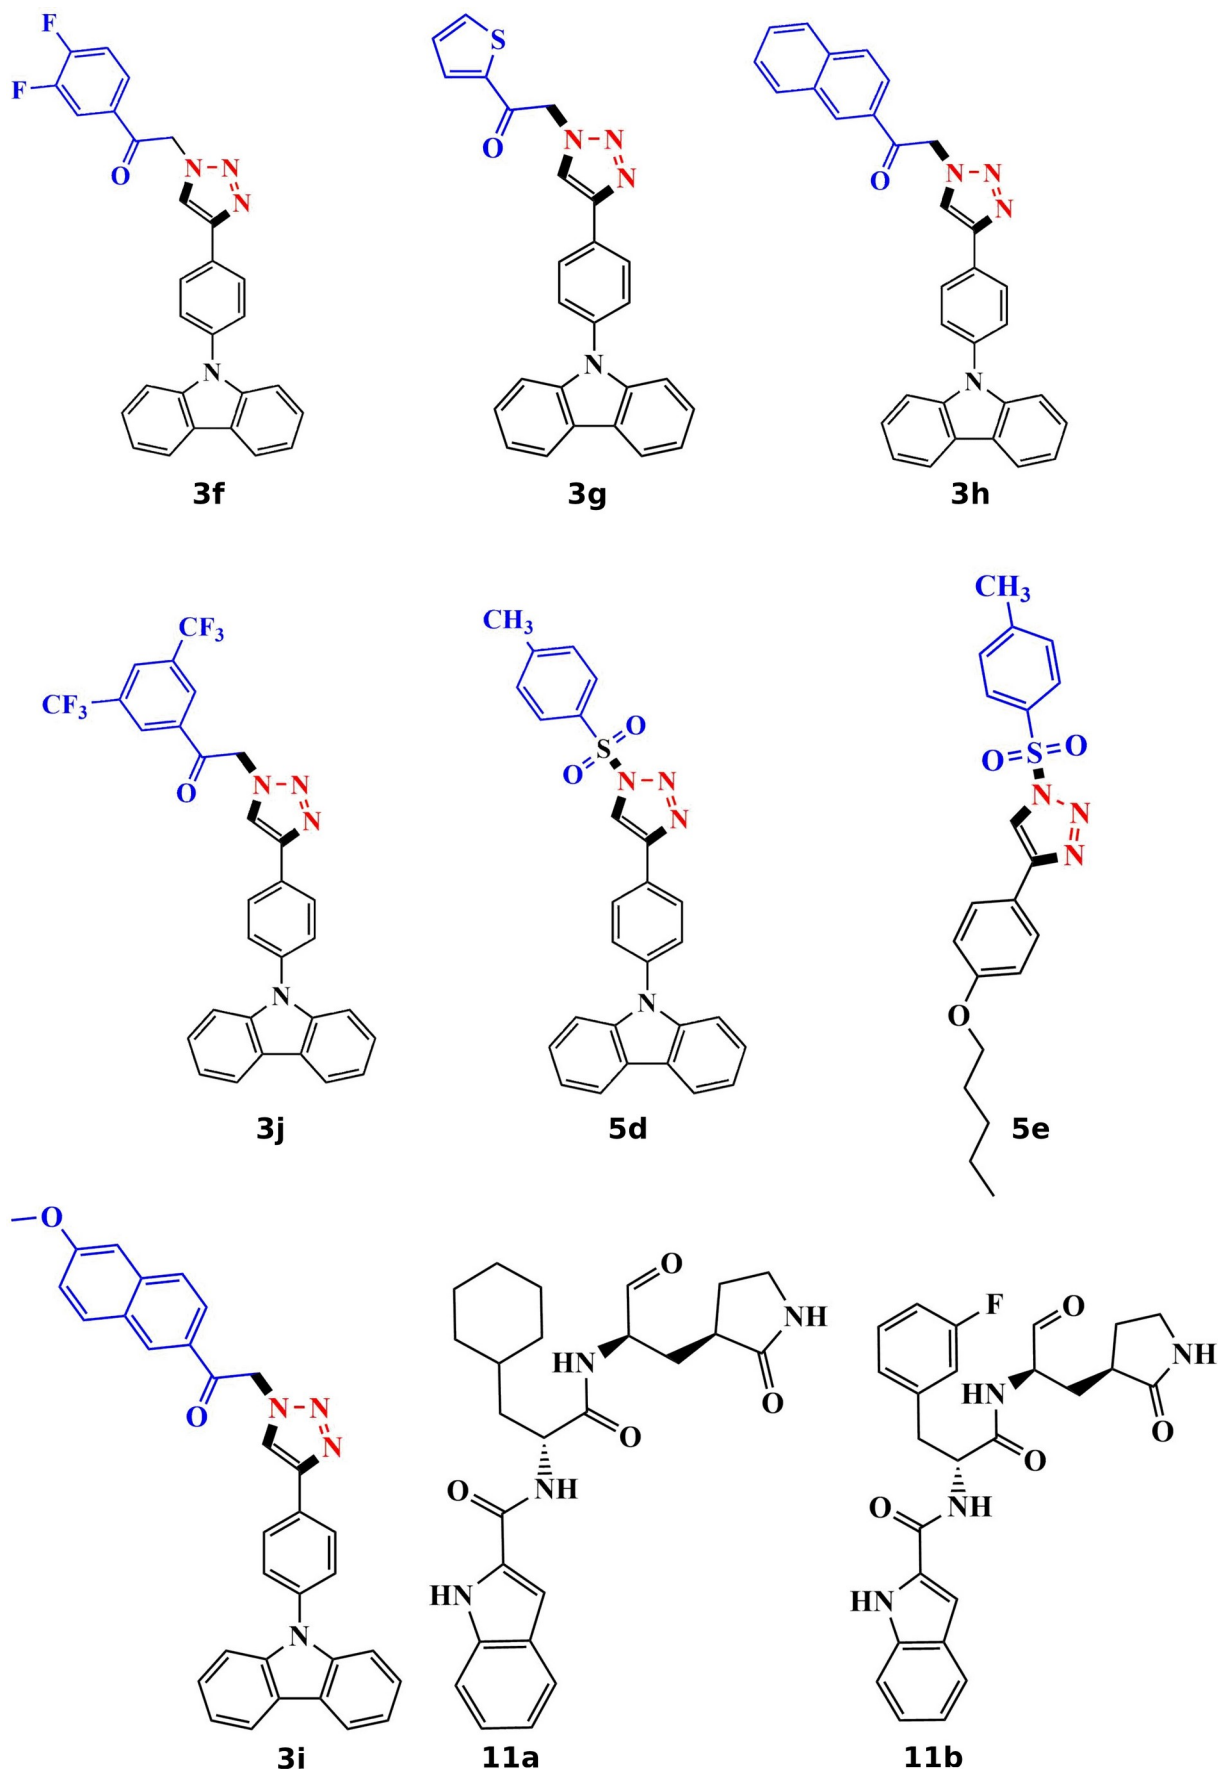

**Figure S1:** Structure of 1,2,3-triazole scaffolds and two co-crystallized inhibitors of M<sup>Pro</sup> protein.

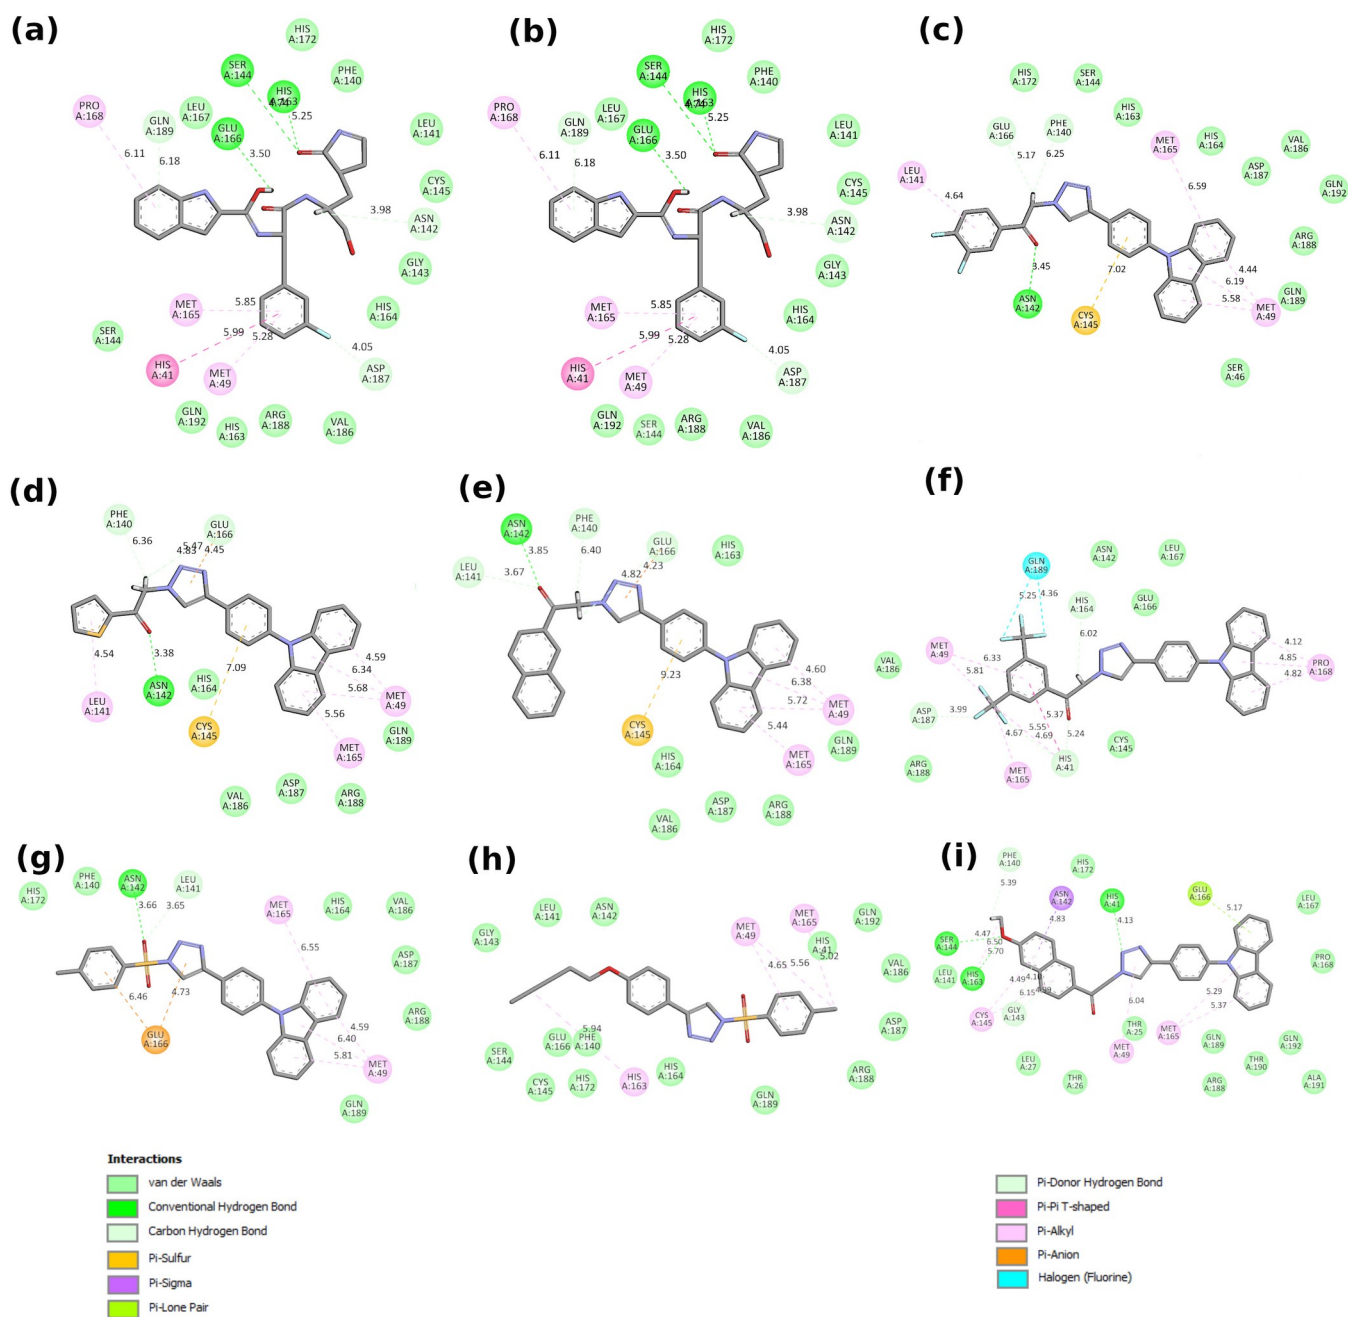

**Figure S2:** 2-D interactions of SARS-CoV-2 Mpro complexes with co-crystallized and 1,2,3-triazole scaffolds (a) 11a, (b) 11b, (c) 3f, (d) 3g, (e) 3h, (f) 3j, (g) 5d, (h) 5e, and (i) 3i.

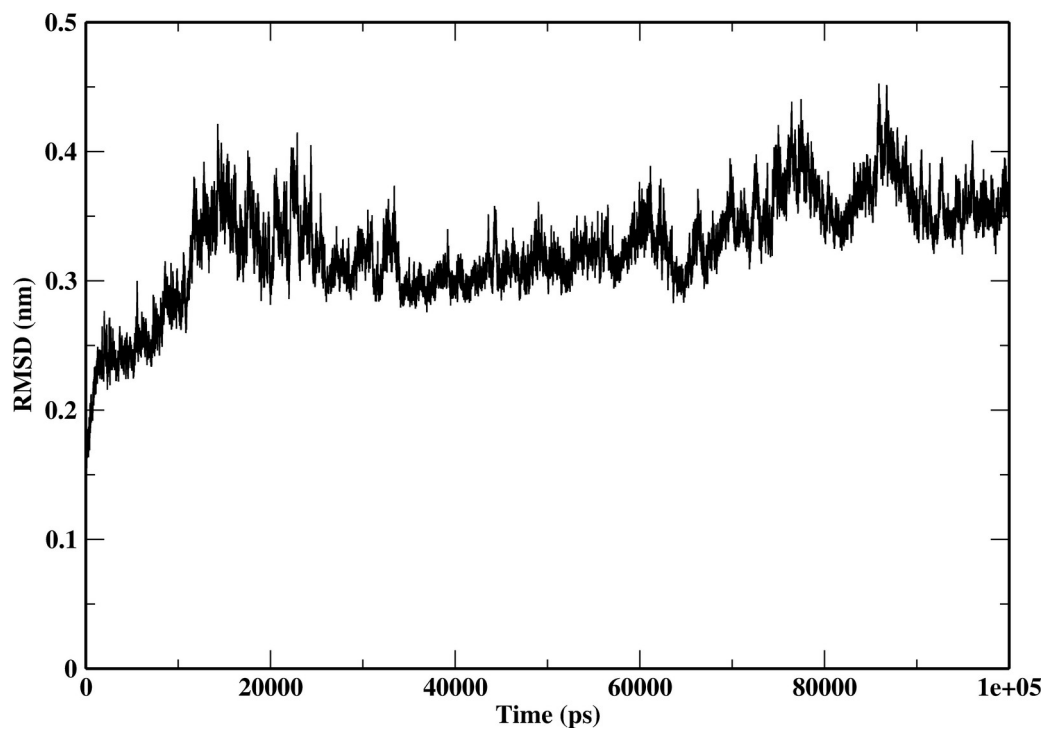

**Figure S3:** Backbone RMSD shown as a function of time for the apo- $M^{\text{pro}}$  protein.

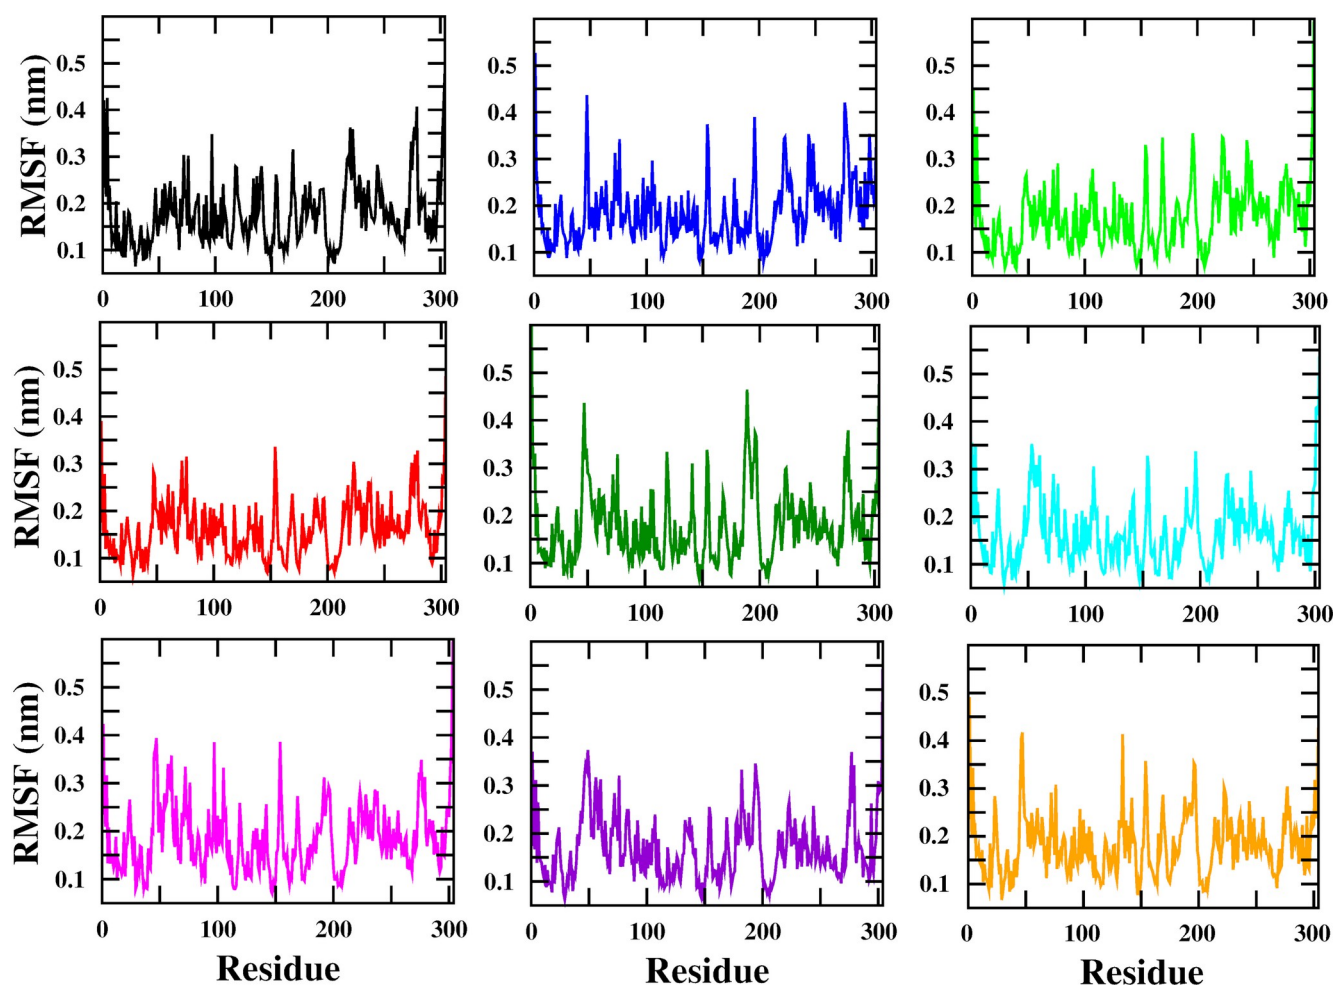

**Figure S4:** RMSF for the backbone C  $\alpha$ -atoms of Mpro complexes with 11a (black), 11b (blue), 3f (green), 3g (red), 3h (dark green), 3j (cyan), 5d (magenta), 5e (violet), and 3i (yellow).

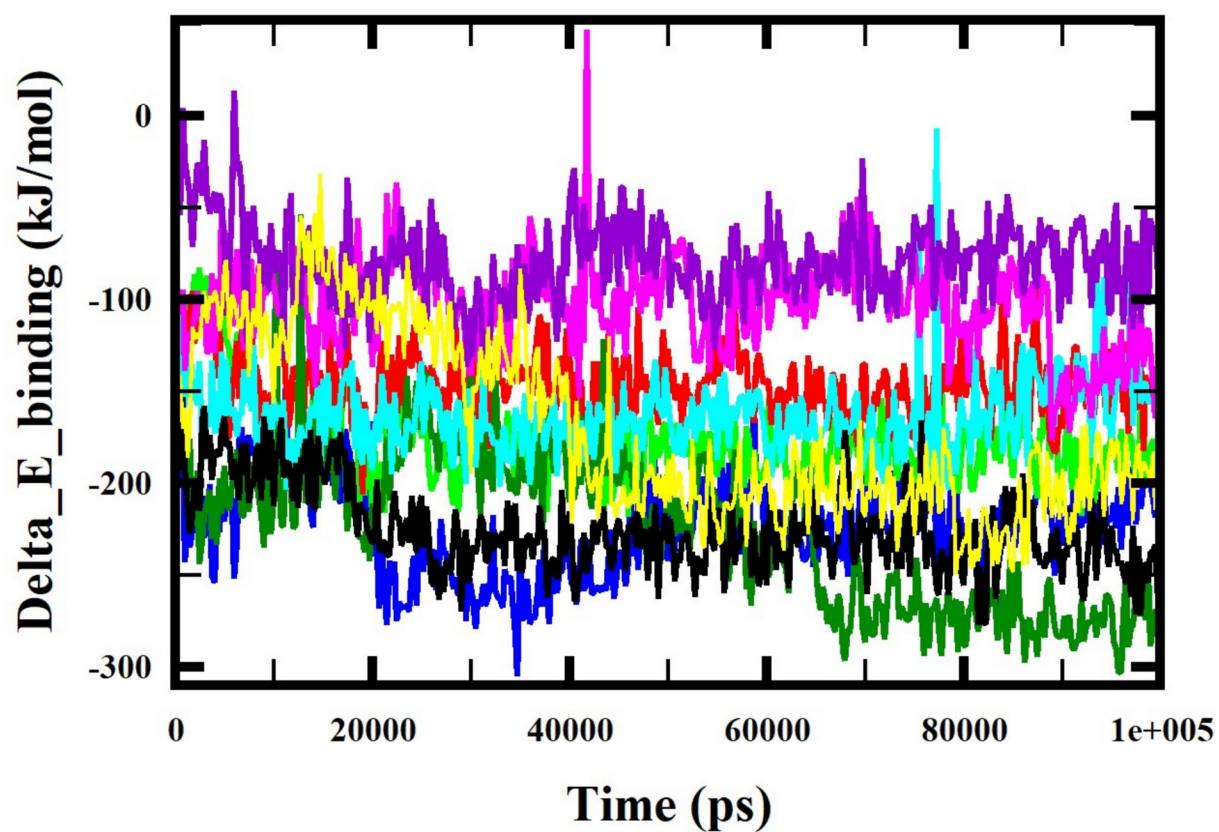

**Figure S5:** Graphical representation of the Delta\_E\_Binding free energy kJ/mol showing 11a (black), 11b (blue), 3f (green), 3g (red), 3h (dark green), 3j (cyan), 5d (magenta), 5e (violet), and 3i (yellow).

**Table S1.** Residues responsible for the difference in binding free energy of co-crystallized inhibitors and 3h molecule.

| <b>Residues</b> | <b>3h</b> | <b>11a</b> | <b>11b</b> |
|-----------------|-----------|------------|------------|
| LEU-27          | -5.74     | -3.26      | -2.96      |
| HIS-41          | -4.58     | -4.77      | -2.75      |
| SER-46          | -2.65     | -1.05      | -1.11      |
| MET-49          | -3.47     | -8.99      | -7.92      |
| CYS-117         | -2.5      | -0.41      | -0.44      |
| TYR-118         | -2.95     | -0.27      | -0.75      |
| ASN-119         | -4.04     | 0.02       | 0.81       |
| GLY-120         | -1.46     | 0          | 0.04       |
| LEU-141         | -8.03     | -1.63      | -4.33      |
| ASN-142         | -4.16     | -2.86      | -4.24      |
| HIS-164         | -2.35     | -3.85      | -6.33      |
| MET-165         | -9.72     | -15.45     | -13.33     |
| GLU-166         | -3.22     | -1.86      | 2.15       |
| LEU-167         | -4.97     | -3.32      | -5.12      |
| PRO-168         | -4.97     | -2.53      | -3.3       |
| HIS-164         | -2.35     | -3.85      | -6.33      |
| MET-165         | -9.72     | -15.45     | -13.33     |
| GLU-166         | 3.22      | -1.86      | 2.15       |
| LEU-167         | -4.97     | -3.32      | -5.12      |
| PRO-168         | -4.97     | -2.53      | -3.3       |
| ASP-187         | -0.74     | -4.34      | -2.74      |
| ARG-188         | -0.22     | -1.62      | -0.09      |
| GLN-189         | -0.89     | -10.6      | -6.63      |
| THR-190         | -1.06     | -3.08      | -3.43      |
| ALA-191         | -1.09     | -2.07      | -1.95      |

**Table S2.** Quantum-mechanical quasi-harmonic configurational entropy values for the selected complexes.

| <b>S. No.</b> | <b>Complexes</b>      | <b>Entropy (J/mol K)</b> |
|---------------|-----------------------|--------------------------|
| 1.            | M <sup>pro</sup> -11a | 34283.7                  |
| 2.            | M <sup>pro</sup> -11b | 33971.5                  |
| 3.            | M <sup>pro</sup> -3h  | 34681.1                  |
